# Supplementary material for: Antimicrobial-Resistant Escherichia coli from Environmental Waters in Northern Colorado
Source: J Environ Public Health. 2019 Feb 18;2019:3862949. doi: 10.1155/2019/3862949 (PMC6397973; doi:10.1155/2019/3862949)
Supplement: Supplementary Materials — Figure S1: a map of Fort Collins, Colorado, and the surrounding area with sampling locations of environmental waters. Table S1: AMR profiles of the individual E. coli isolates examined with broth microdilution. Table S2: an expanded whole-genome sequence table that details all genes detected across wastewater E. coli isolates. [file 3862949.f1.zip]

Archive with 3 entries (3 files):
- 3862949.f1/Final JEPH Supplementary Figure S1_JEPH_2637082.docx
- 3862949.f1/Final JEPH Supplementary Table S1_JEPH_2637083.docx
- 3862949.f1/Final Supplimentary Dataset S1 JEPH_JEPH_2637084.xlsx
