# Supplementary material for: Antimicrobial-Resistant Escherichia coli from Environmental Waters in Northern Colorado
Source: J Environ Public Health. 2019 Feb 18;2019:3862949. doi: 10.1155/2019/3862949 (PMC6397973; doi:10.1155/2019/3862949)
Supplement: Supplementary Materials — Figure S1: a map of Fort Collins, Colorado, and the surrounding area with sampling locations of environmental waters. Table S1: AMR profiles of the individual E. coli isolates examined with broth microdilution. Table S2: an expanded whole-genome sequence table that details all genes detected across wastewater E. coli isolates. [file 3862949.f1.zip › 3862949.f1/Final Supplimentary Dataset S1 JEPH_JEPH_2637084.xlsx]

## Sheet: Sheet1
DATASET S1 Presence and absence of antimicrobial resistance genes for selected sewage and WWTP influent Escherichia coli isolates established through whole genome sequencing.
Organization is based on antimicrobial drug class and mechanism of action. Results are based on a minimum 85% match of gene sequence to that in RESFINDER and CARD databases, across at least 50% of the gene sequence length.
			Isolation source	influent	influent	sewer	sewer	sewer	influent	influent	influent	influent	influent	influent	influent	influent	sewer	sewer	sewer	sewer	sewer	sewer	influent	influent	influent	sewer	influent	sewer
			Isolate number	2	3	10	14	23	26	27	43	44	45	47	50	51	57	62	63	67	71	9	39	41	42	NA	50	46
Number	Gene name	Description	Assigned name	EC001	EC002	EC003	EC004	EC005	EC006	EC007	EC008	EC009	EC010	EC011	EC012	EC013	EC014	EC015	EC016	EC017	EC018	EC019	EC020	EC021	EC022	EC030	EC031	EC032
			Isolate ID	INF11716ED	INF11716EB	M1671711716OL	M1762916EK	M1743011716ED	INF9716R1E	INF9716R2E	INF41217EH	INF41217EI	INF41217EJ	INF41217EL	INF41217EO	INF41217EP	M1671741217EC	M161741217EH	M161741217EI	M1708041217EG	M1709841217EL	M1762916KJ	INF41217ED	INF41217EF	INF41217EG	M17098R6	INF41217EO	M1762916EK
			NCBI SRA ID	none	SRR6796159	SRR6795908	SRR7122166	SRR6795927	SRR6796066	SRR6796115	SRR6795911	SRR6796162	SRR6796135	SRR6796140	SRR7122163	SRR6795924	SRR6795900	SRR6795915	SRR6795921	SRR6796570	SRR6796424	SRR6795818	SRR6795857	SRR6796567	SRR6796568	SRR6796404	SRR7121423	SRR7079316
1	AAC(3)-IIa	gb|NC_020088.1|+|15617-16478|ARO:3002533|AAC(3)-Iia															100
2	AAC(3)-VIa	gb|M88012|+|192-1092|ARO:3002540|AAC(3)-VIa																			99.778
3	AAC(6')-Ib	gb|AY954726|+|1965-2604|ARO:3002546|AAC(6')-Ib												99.5305	99.5305	99.5305					99.2995						99.5305
4	AAC(6')-Ib11	gb|AY136758|+|377-947|ARO:3002582|AAC(6')-Ib11																			99.0234
5	AAC(6')-Ib3	gb|FJ854362|+|1702-2257|ARO:3002576|AAC(6')-Ib3																			99.2188
6	AAC(6')-Ib4	gb|AF445082|+|2788-3343|ARO:3002577|AAC(6')-Ib4																			99.2188
7	AAC(6')-Ib7	gb|Y11946.1|+|0-980|ARO:3002578|AAC(6')-Ib7												98.7692	98.7692	98.7692					98.4293						98.7692
8	aac(6')Ib-cr	aac(6')Ib-cr_1_DQ303918												100	100	100					99.8043						100
9	AAC(6')-IId	gb|KC543497.1|+|404932-405451|ARO:3002548|AAC(6')-IId					100														99.2172							100
10	aadA1	aadA1_3_JQ414041																			100
11	aadA4	gb|AY138986|+|0-789|ARO:3002604|aadA4		94.9367
12	aadA5	aadA5_1_AF137361		100		100		100	100
13	aadB	aadB_1_JN119852																			100
14	AcrA	gb|NC_000913.3|-|484425-485619|ARO:3004043|Escherichia		99.9162	100	100	99.7487	100	99.2462	99.0787	100	100	100	99.0787	99.0787	99.0787	99.0787	99.7487	99.0787	99.0787	100	99.7487	100	100	100	100	99.0787	99.7487
15	acrB	gb|NC_000913.3|-|481253-484403|ARO:3000216|acrB		100	99.5873	100	99.5556	100	99.0476	99.0476	99.9683	99.9683	99.9683	98.7619	98.7363	98.7619	99.0476	99.2381	99.0476	99.0476	100	99.5556	99.9683	99.9683	99.9683	100	98.7619	99.5556
16	acrD	gb|NC_007779|+|2586250-2589364|ARO:3000491|acrD		99.9679	99.2616	99.7753	99.2616	99.7753	98.748	98.6838	99.5827	99.5827	99.5827	98.6517	98.6517	98.6517	98.7801	98.8122	98.7801	98.7801	98.7801	99.2616	99.5827	99.5827	99.5827	100	98.6517	99.2616
17	acrE	gb|U00096|+|3413863-3415021|ARO:3000499|acrE		100	99.0509		98.9646		98.3607	98.6195	98.9646	98.9646	98.9646	98.7921	98.7921	98.7921	97.843	98.9646	97.843	97.843	99.8967	98.9646	98.9646	98.9646	98.9646	98.9646	98.7921	98.9646
18	acrF	gb|U00096|+|3415032-3418137|ARO:3000502|acrF		99.9678	99.0663		99.0663		97.7785	97.8751	99.0663	99.0663	99.0663	96.5551	96.5551	96.5551	98.0683	98.8731	98.0683	98.0683	99.9678	99.0663	99.0663	99.0663	99.0663	99.1307	96.2586	99.0663
19	acrS	gb|U00096|-|3412802-3413465|ARO:3000656|acrS		99.8494	98.7952		99.0964		98.9458	97.5904	99.0964	99.0964	99.0964	98.3434	98.3434	98.3434	97.2892	99.3976	97.2892	97.2892	100	99.0964	99.0964	99.0964	99.0964	98.9458	98.3434	99.0964
20	APH(3')-IIa	gb|NG_047417.1|+|0-995|ARO:3002644|APH(3')-IIa								100
21	aph(3')-IIb	aph(3')-IIb_1_X90856
22	aph(6)-Ic	aph(6)-Ic_1_X01702								99.8195
23	APH(6)-Id	gb|AF024602|+|3155-3992|ARO:3002660|APH(6)-Id									99.8773	99.8807	99.8807						99.8807		99.8807	99.8807	99.8807	99.8807	99.8807
24	ArmR	gb|NC_002516.2|-|4165718-4165880|ARO:3004056|ArmR
25	arnA	gb|U00096|+|2368038-2370021|ARO:3002985|arnA		100	98.9919	100	99.0927	100	97.2278	95.8165	100	100	100	97.5302	97.5302	97.5302	95.8165	98.7399	95.8165	95.8165	97.2278	99.5968	100	100	100	99.9496	97.5302	99.0927
26	ARR-3	ARR-3_1_JF806499																			100
27	bacA	gb|U00096|-|3203309-3204131|ARO:3002986|bacA		100	99.391	100	100	100	96.2241	96.5895	100	100	100	98.2948	98.2948	98.2948	98.0512	98.6602	98.0512	98.0512	98.5384	100	100	100	100	99.0279	98.2948	100
28	baeR	gb|NC_007779|+|2166412-2167135|ARO:3000828|baeR		96.2707	98.2044	100	100	100	98.0609	98.0609	99.4475	99.4475	99.4475	97.0914	97.0914	97.0914	97.3684	99.4475	97.3684	97.3684	100	99.5856	99.4475	99.4475	99.4475	100	97.0914	100
29	baeS	gb|AP009048|+|2165012-2166416|ARO:3000829|baeS		92.242	99.0747	98.8612	99.9288	98.8612	96.3701	90.5338	100	100	100	90.5338	90.5338	90.5338	91.4591	98.0783	91.4591	91.4591	99.9288	99.1459	100	100	100	99.9288	90.5338	99.9288
30	blaCMY-2	blaCMY-2_1_X91840								100
31	blaCTX-M-15	blaCTX-M-15_23_DQ302097			100		100					100		100	100	100	100		100	100			100	100		100	100	100
32	blaCTX-M-27	blaCTX-M-27_1_EU916273																100
33	blaGES-5	blaGES-5_1_DQ236171					100																					100
34	blaOXA	blaOXA-1_1_J02967												100	100	100					100						100
35	blaOXA-50	blaOXA-50_3_AY306132
36	blaPAO	blaPAO_4_AY083592
37	blaSED1	blaSED1_1_AF321608
38	blaSHV-2	blaSHV-2_2_AF282921																			100
39	blaTEM-124	blaTEM-124_1_AY327540										99.6205
40	blaTEM-1B	blaTEM-1B_1_JF910132					100				100				100							100			100		100	100
41	blaTEM-1C	blaTEM-1C_5_FJ560503															100		100	100
42	cat	gb|AF326777|-|23980-24640|ARO:3002670|cat
43	catB3	gb|NC_019368.1|+|58200-58833|ARO:3002676|catB3																			99.842
44	catB7	catB7_1_AF036933
45	catI	gb|V00622|+|243-903|ARO:3002683|catI
46	cml	cml_1_M22614																			96.2284
47	cmlA1	cmlA1_1_M64556																			99.6825
48	CMY-17	gb|AY513266|+|164-1310|ARO:3002028|CMY-17								99.9128
49	CMY-18	gb|AY743434|+|46-1198|ARO:3002029|CMY-18								99.4796
50	CMY-2	gb|X91840|+|0-1146|ARO:3002013|CMY-2								100
51	CMY-23	gb|DQ463751|+|75-1221|ARO:3002034|CMY-23								99.9128
52	CMY-58	gb|HQ185697|+|1267-2413|ARO:3002072|CMY-58								99.9128
53	CMY-59	gb|AB587082|+|0-1188|ARO:3002069|CMY-59								99.9158
54	CMY-68	gb|JN714480|+|1039-2185|ARO:3002081|CMY-68								94.5946
55	CMY-75	gb|JQ733572|+|1027-2173|ARO:3002088|CMY-75								94.769
56	CMY-94	gb|JX514368|+|271-1417|ARO:3002107|CMY-94								99.9128
57	cpxA	gb|NC_002695|-|4903561-4904935|ARO:3000830|cpxA		98.9818	98.9818	98.9091	98.9091	98.9091	98.6182	98.8364	98.7636	98.7636	98.7636	98.5391	98.5391	98.5391	99.0545	98.9091	99.0545	99.0545	98.9818	98.9091	98.7636	98.7636	98.7636	98.1091	98.5391	98.9091
58	CpxR	gb|LT673656.1|-|1884344-1885022|ARO:3004054|Pseudomonas
59	CRP	gb|AP009048|-|4153663-4154296|ARO:3000518|CRP		99.8423	99.3691	99.8423	99.2114	99.8423	99.0536	99.2114	99.3691	99.3691	99.3691	99.2114	99.2114	99.2114	99.2114	99.0536	99.2114	99.2114	99.6845	99.2114	99.3691	99.3691	99.3691	99.8423	99.2114	99.2114
60	CTX-M-1	gb|X92506|+|0-876|ARO:3001864|CTX-M-1
61	CTX-M-101	gb|HQ398214|+|249-1125|ARO:3001960|CTX-M-101			99.886		99.886																99.886			99.886
62	CTX-M-103	gb|HG423149|+|39-915|ARO:3001962|CTX-M-103			99.886																					99.886		99.886
63	CTX-M-11	gb|AY005110|+|0-846|ARO:3001874|CTX-M-11																				98.6175
64	CTX-M-117	gb|JN227085|+|351-1227|ARO:3001977|CTX-M-117			99.886		99.886																			99.886
65	CTX-M-12	gb|AF305837|+|0-876|ARO:3001875|CTX-M-12			98.9738
66	CTX-M-136	gb|KC351754|+|157-1033|ARO:3001995|CTX-M-136										99.5439
67	CTX-M-14	gb|AF252622|+|1740-2616|ARO:3001877|CTX-M-14				99.886		99.886
68	CTX-M-144	gb|KJ020573|+|274-1150|ARO:3002002|CTX-M-144																						99.7719		99.7719		99.7719
69	CTX-M-15	gb|AY044436|+|1435-2311|ARO:3001878|CTX-M-15			100		100					100											100	100		100		100
70	CTX-M-22	gb|AY080894|+|3-879|ARO:3001884|CTX-M-22																						99.7719
71	CTX-M-23	gb|AF488377|+|62-938|ARO:3001885|CTX-M-23			98.8597
72	CTX-M-27	gb|AY156923|+|0-876|ARO:3001889|CTX-M-27							100
73	CTX-M-3	gb|Y10278|+|0-876|ARO:3001866|CTX-M-3			99.886																		99.886			99.886		99.886
74	CTX-M-33	gb|AY238472|-|12-888|ARO:3001895|CTX-M-33			99.886		99.886					99.886											99.886	99.886		99.886		99.886
75	CTX-M-52	gb|DQ223685|+|0-876|ARO:3001914|CTX-M-52			99.6579
76	CTX-M-55	gb|DQ885477|+|0-876|ARO:3001917|CTX-M-55		100
77	CTX-M-61	gb|EF219142|+|10-886|ARO:3001922|CTX-M-61					98.8597
78	CTX-M-66	gb|EF576988|+|239-1115|ARO:3001927|CTX-M-66			99.7719		99.7719																	99.7719
79	CTX-M-71	gb|FJ815436|+|195-1071|ARO:3001932|CTX-M-71			99.886		99.886																99.886			99.886		99.886
80	CTX-M-72	gb|AY847148|+|8-884|ARO:3001933|CTX-M-72			99.7719																			99.7719
81	CTX-M-82	gb|DQ256091|+|98-974|ARO:3001943|CTX-M-82					99.886				98.6		100										99.886			99.886		99.886
82	dfrA14	gb|EU780012|+|2162-2645|ARO:3002859|dfrA14									99.7934	99.7934	99.7934						99.7934				99.7934	99.7934	99.7934
83	dfrA17	dfrA17_1_FJ460238		100		100		100	100												100
84	emrA	gb|AP009048|+|2810082-2811255|ARO:3000027|emrA		99.9148	97.5298	99.8296	99.8296	99.8296	97.9557	98.2964	99.9148	99.9148	99.9148	98.0409	98.0409	98.0409	98.2964	98.1261	98.2964	98.2964	97.8705	99.8296	99.9148	99.9148	99.9148	100	98.0409	99.8296
85	emrB	gb|U00096|+|2812615-2814154|ARO:3000074|emrB		100	99.8052	99.9351	100	99.9351	97.987	98.4416	100	100	100	98.4416	99.8645	98.4416	98.2468	99.9351	98.2468	98.2468	99.8645	100	100	100	100	100	99.8645	100
86	emrD	gb|GG749185.1|+|116812-118003|ARO:3000309|emrD		98.1528	98.6566	97.9849	98.1528	97.9849	98.1528	98.1528	98.2368	98.2368	98.2368	97.4811	97.4811	97.4811	98.6566	98.2368	98.6566	98.6566	98.1528	98.1528	98.2368	98.2368	98.2368	97.9849	97.4811	98.1528
87	emrE	gb|Z11877.1|+|0-1244|ARO:3004039|Escherichia				99.2322		99.2322		98.9453
88	emrK	gb|D78168|+|536-1592|ARO:3000206|emrK		100	98.1079	99.8108	99.3377	99.8108	97.824	97.2564	100	100	100	97.7294	97.7294	97.7294	99.7162	99.7162	99.7162	99.7162	98.0132		100	100	100	99.9054	97.7294	99.3377
89	emrR	gb|NC_000913.3|+|2810769-2811300|ARO:3000516|emrR		100	99.6234	100	100	100	99.435	99.435	100	100	100	98.4934	98.4934	98.4934	99.435	100	99.435	99.435	99.435	100	100	100	100	100	98.4934	100
90	emrY	gb|D78168|+|1591-3130|ARO:3000254|emrY		99.8701	98.1169	99.026	98.8312	99.026	97.4675	98.0519	99.9351	99.9351	99.9351	97.6623	97.6623	97.6623	98.7662	98.4416	98.7662	98.7662	97.6623		99.9351	99.9351	99.9351	99.026	97.6623	98.8312
91	evgA	gb|NC_002695|+|3211891-3212506|ARO:3000832|evgA		100	99.8377	100	98.7013	100	99.026	99.1883	99.6753	99.8377	100	99.026	99.026	99.026	99.0244	99.0244	99.0244	99.0244	99.1883		99.6753	99.6753	99.6753	100	99.026	98.7013
92	evgS	gb|U00096|+|2484373-2487967|ARO:3000833|evgS		100	97.6634	99.9722	98.5814	99.9722	96.8289	96.7455	97.9416	98.2197	99.388	96.3282	96.3282	96.3282	98.9152	98.0807	98.9152	98.9152	96.7455		97.886	97.9972	98.1919	99.7218	96.3282	98.5814
93	gadE	gb|NC_000913.3|+|3658365-3658893|ARO:3003834|gadE		100	100	100	100	100	99.8106	98.6742	100	100	100	97.9167	97.9167	97.9167	98.6742	99.8106	98.6742	98.6742	100	100	100	100	100	100	97.9167	100
94	gadW	gb|CP015085.1|-|2551711-2552440|ARO:3003838|gadW		94.6502	94.513	94.513	94.3759	94.513	95.6104	96.0219	94.3759	94.3759	94.3759	100	100	100	96.0219	94.3759	96.0219	96.0219	94.6502	94.2387	94.3759	94.3759	94.3759	94.6502	100	94.3759
95	gadX	gb|NC_007779|+|3974604-3975429|ARO:3000508|gadX		100	100	100	97.9419	100	94.3099	93.8257	97.9419	97.9419	97.9419	93.9467	93.9467	93.9467	93.8257	97.8208	93.8257	93.8257	100	97.9419	97.9419	97.9419		100	93.9467	97.9419
96	GES-1	gb|AF156486|+|1331-2195|ARO:3002330|GES-1					99.7688																					99.7688
97	GES-10	gb|FJ820124|+|1123-1987|ARO:3002339|GES-10					99.422
98	GES-11	gb|FJ854362|+|701-1565|ARO:3002340|GES-11					99.7688																					99.7688
99	GES-13	gb|GU169702|+|608-1472|ARO:3002342|GES-13					99.7688																					99.7688
100	GES-16	gb|HM173356|+|511-1375|ARO:3002345|GES-16																										99.7688
101	GES-20	gb|JN596280|+|2847-3711|ARO:3002349|GES-20					99.8844																					99.8844
102	GES-21	gb|JQ772478|+|140-1004|ARO:3002350|GES-21																										99.6532
103	GES-8	gb|AF329699|+|372-1236|ARO:3002337|GES-8					99.422
104	GES-9	gb|AY920928|+|2689-3553|ARO:3002338|GES-9																										99.6532
105	H-NS	gb|NC_002695|-|1737553-1737967|ARO:3000676|H-NS		99.2771	99.759	99.5181	99.5181	99.5181	99.5181	99.2771	99.2771	99.2771	99.2771	99.2771	99.2771	99.2771	99.2771	99.2771	99.2771	99.2771	99.2771	99.5181	99.2771	99.2771	99.2771	99.2771	99.2771	99.5181
106	kdpE	gb|NC_000913.3|-|721055-721733|ARO:3003841|kdpE		99.8305	97.1893	99.8366	96.7552	99.8387	95.4277	97.0501	100	100	100	95.5423	95.5423	95.5423	96.7552	97.1768	96.7359	96.7552	100	96.8504	100	100	100	100	95.5423	96.7552
107	leuO	gb|NC_000913.3|+|84367-85312|ARO:3003843|leuO		100		99.8942	99.8942	99.8942	98.0952	97.3545	99.0476	99.0476	99.0476	97.4603	97.4603	97.4603	97.3545	99.0476	97.3545	97.3545	100	99.8942	99.0476	99.0476	99.0476	99.2593	97.4603	99.8942
108	marA	gb|NC_007779|+|1621287-1621671|ARO:3000263|marA		100	100	100	99.7403	100	99.4805	99.7403	100	100	100	98.961	98.961	98.961	99.7403	99.4805	99.7403	99.7403	100	99.7403	100	100	100	100	98.961	99.7403
109	mdfA	gb|JQ394987|+|0-1233|ARO:3001328|mdfA		98.3779	97.5669	98.3779	98.3779	98.3779	96.5937	96.7559	97.8913	97.8913	97.8913	96.2693	96.2693	96.2693	96.837	97.2425	96.837	96.837	98.3779	98.3779	97.8913	97.8913	97.8913	97.3236	96.2693	98.3779
110	mdtA	gb|U00096|+|2154015-2155263|ARO:3000792|mdtA		96.9576	97.3579	97.5981	98.0785	97.5981	97.438	96.237	97.9984	97.9984	97.9984	95.5965	95.5965	95.5965	96.237	99.5997	96.237	96.237	100	99.3595	97.9984	97.9984	97.9984	98.1585	95.5965	98.0785
111	mdtB	gb|U00096|+|2155262-2158385|ARO:3000793|mdtB		97.2471	98.2074	97.8873	99.7119	97.8873	96.735	95.9987	99.5519	99.5519	99.5519	96.1588	96.1588	96.1588	95.9987	99.7119	95.9987	95.9987	99.8079	98.7836	99.5519	99.5519	99.5519	97.6633	96.1588	99.7119
112	mdtC	gb|U00096|+|2158385-2161463|ARO:3000794|mdtC		96.1026	97.5966	97.6616	98.8308	97.6616	97.1419	95.583	98.9607	98.9607	98.9607	93.9916	93.9916	93.9916	95.583	97.9214	95.583	95.583	99.9026	98.7983	98.9607	98.9607	98.9607	97.8564	93.9916	98.8308
113	mdtD	gb|U00096|+|2161463-2162879|ARO:3001330|mdtD		97.3183	97.8829	97.4594	99.8589	97.4594	97.53	97.4594	98.5886	98.5886	98.5886	97.036	97.036	97.036	96.6126	99.012	96.6126	96.6126	99.8589	99.7883	98.5886	98.5886	98.5886	99.9294	97.036	99.8589
114	mdtE	gb|AP009048|-|3980025-3981183|ARO:3000795|mdtE		100	97.4645	100	99.5686	100	98.7921	98.4469	100	100	100	98.5332	98.5332	98.5332	98.4469	99.7412	98.4469	98.4469	100	99.5686	100	100	100	100	98.5332	99.5686
115	mdtF	gb|U00096|+|3660413-3663527|ARO:3000796|mdtF		99.9358	99.9037	99.9358	98.4912	99.9358	98.4912	98.0738	99.9358	99.9358	99.9358	97.3034	97.2279	97.3034	98.0096	98.4912	98.0096	98.0096	99.9679	98.4912	99.9358	99.9358		99.9679	97.3034	98.4912
116	mdtG	gb|NC_007779|-|1115840-1117067|ARO:3001329|mdtG		100	99.2671	99.9186	99.1857	99.9186	98.6156	98.2899	100	100	100	98.4528	98.4528	98.4528	98.2899	99.5114	98.2899	98.2899	100	99.1857	100	100	100	100	98.4528	99.1857
117	mdtH	gb|U00096|-|1124117-1125326|ARO:3001216|mdtH		100	98.2645	97.9339	98.595	97.9339	97.8512	97.686	97.9339	97.9339	97.9339	98.3471	98.3471	98.3471	97.8512	98.5124	97.8512	97.8512	99.9174	98.595	97.9339	97.9339	97.9339	100	98.3471	98.595
118	mdtL	gb|U00096|+|3891614-3892790|ARO:3001215|mdtL		100	100	98.3008	98.3008	98.3008	97.0263	96.6865	98.3008	98.3008	98.3008	96.6015	96.6015	96.6015	96.6865	97.1113	96.6865	96.6865	99.915	98.3008	98.3008	98.3008	98.3008	100	96.6015	98.3008
119	mdtM	gb|U00096|-|4567286-4568519|ARO:3001214|mdtM		99.919	95.9481	95.5446	96.3533	95.5446	96.3533	95.705	96.7544	96.2329	96.2723	95.0567	95.0567	95.0567	95.624	96.1102	95.624	95.624	96.2723	96.3533	96.6771	96.2723	96.2723	95.6271	95.0567	96.3533
120	mdtN	gb|AP009048|-|4306556-4307588|ARO:3003548|mdtN		99.8062	97.1899	100	100	100	96.4147	97.7713				96.2209	96.2209	96.2209		98.062	97.7713		100					100	96.2209	100
121	mdtO	gb|AP009048|-|4304505-4306557|ARO:3003549|mdtO		100	99.4152	99.6589	98.9279	99.6589	96.345	96.4425	99.786	99.786	99.786	97.076	97.076	97.076		98.2456	96.8811		99.9513		99.786	99.786	99.786	99.9025	97.076	98.9279
122	mdtP	gb|AP009048|-|4303042-4304509|ARO:3003550|mdtP		100	98.0913	99.9318	98.364	99.9318	97.4778	96.6599	98.1595	98.1595	98.1595	97.6142	97.6142	97.6142		98.1595	96.8643		100		98.1595	98.1595	98.1595	100	97.6142	98.364
123	MexA	gb|NC_002516|+|472023-473175|ARO:3000377|MexA
124	MexC	gb|U57969|+|294-1458|ARO:3000800|MexC
125	mexH	gb|NC_002516|+|4706409-4707522|ARO:3000807|mexH
126	mexI	gb|NC_002516|+|4707534-4710624|ARO:3000808|mexI
127	mexJ	gb|NC_002516.2|-|4119269-4120373|ARO:3003692|mexJ
128	mexK	gb|AE004091.2|-|4116187-4119265|ARO:3003693|mexK
129	mexL	gb|AE004091.2|+|4120468-4121107|ARO:3003710|mexL
130	mexP	gb|AB219524.1|+|22-1180|ARO:3003698|mexP
131	mfd	gb|NC_000913.3|-|1170517-1173964|ARO:3003844|mfd		99.942	97.6211	98.5785	99.1877	98.5785	97.4761	97.418	98.9846	98.9846	98.9846	97.0119	97.0119	97.0119	97.5051	99.1007	97.5051	97.5051	100	99.2167	98.9846	98.9846	98.9846	99.942	97.0119	99.1877
132	mph(A)	mph(A)_1_D16251		100					100						98.7111						98.7111						98.7111
133	Mrx	gb|AY522923.1|-|7744-8983|ARO:3003839|Mrx		100					100						100						100						100
134	msbA	gb|NC_000913.3|+|966620-968369|ARO:3003950|msbA		100	98.9708	100	98.9708	100	98.9708	99.028	100	100	100	98.056	98.056	98.056	98.7993	99.028	98.7993	98.7993	100	98.9708	100	100	100	100	98.056	98.9708
135	msrB	gb|NC_000913.3|+|0-414|ARO:3002818|msrB		99.7585	99.2754	99.0338	99.5169	99.0338	99.7585		100	100	100	99.2754	99.2754	99.2754	99.5169	99.7585	99.5169	99.5169	99.5169	99.5169	100	100	100	99.5169	99.2754	99.5169
136	OpmB	gb|NC_002516.2|-|2846282-2847779|ARO:3004072|OpmB
137	OpmH	gb|NC_002516.2|+|5584100-5585549|ARO:3003682|OpmH
138	OprJ	gb|U57969|+|4622-6062|ARO:3000802|OprJ
139	OprN	gb|NC_002516|+|2813193-2814612|ARO:3000805|OprN
140	OXA-1	gb|KJ510410|+|6950-7826|ARO:3001396|OXA-1												100	100	100					100						100
141	OXA-2	gb|M95287.4|+|0-828|ARO:3001397|OXA-2
142	OXA-50	gb|AY306130|+|0-789|ARO:3001796|OXA-50
143	Pae-Emre	gb|NC_002516.2|+|0-333|ARO:3004038|Pseudomonas
144	patA	gb|NC_000913.3|+|3219493-3220873|ARO:3000024|patA		100	99.9275	100	99.5652	100	96.5942	97.3208	98.6222	98.6222	98.6222	96.9565	96.9565	96.9565	97.3913	99.7826	97.3913	97.3913	97.1739	99.4928	98.6222	98.6222	98.6222	100	96.9565	99.5652
145	PmpM	gb|NC_002516.2|-|1472546-1473980|ARO:3004077|PmpM
146	PmrC	gb|AP009048|-|4338624-4340268|ARO:3003576|PmrC		99.9392	99.696	99.4529	99.3921	99.4529	98.1763	97.3252	99.8176	99.8176	99.8176	91.4286	91.4286	91.4286	97.5076	99.2705	97.5076	97.5076	99.9392	99.3921	99.8176	99.8176	99.8176	100	91.4286	99.3921
147	PmrE	gb|U00096|-|2098446-2099613|ARO:3003577|PmrE		96.1473	96.1473	96.2329	96.1473	96.2329	97.5171	98.1164	85.2641	85.2641	85.2641	95.976	95.976	95.976	96.4041	96.9178	96.4041	96.4041			85.2641	85.2641	85.2641	98.887	95.976	96.1473
148	PmrF	gb|U00096|+|2367070-2368039|ARO:3003578|PmrF		99.8969	99.5876	100	99.5876	100	98.1443	98.0412	100	100	100	97.6289	97.6289	97.6289	98.0412	99.3814	98.0412	98.0412	98.0412	99.3814	100	100	100	100	97.6289	99.5876
149	pp-cat	gb|D16171|+|382-1042|ARO:3002689|plasmid-encoded
150	QnrS1	gb|DQ449578|+|0-657|ARO:3002790|QnrS1			100							100	100				100		100	100			100	100	100	100
151	QnrS2	QnrS2_1_JF261185					100																					100
152	QnrS3	gb|EU077611|+|0-654|ARO:3002792|QnrS3									99.8214
153	QnrS7	gb|KF730651|+|0-657|ARO:3002796|QnrS7										99.8478
154	QnrS8	gb|KF730652|+|0-657|ARO:3002797|QnrS8										99.8478												99.8478
155	QnrS9	gb|KF732714|+|0-657|ARO:3002798|QnrS9										99.8478
156	Sed1	gb|AF321608|+|0-888|ARO:3003561|Sed1
157	strA	strA_4_AF321551									100	100	100						100		99.8756	100	100	100	100
158	strB	strB_1_M96392										100	100						100		100	100	100	100	100
159	sul1	sul1_1_AY224185		100			100		100												99.8733							100
160	sul2	sul2_2_GQ421466									100	100	100						100		100		100	100	100
161	TEM-1	gb|AL513383|+|161910-162771|ARO:3000873|TEM-1					99.884														99.7677							99.884
162	TEM-106	gb|AY101578|+|214-1075|ARO:3000969|TEM-106																										99.768
163	TEM-124	gb|AY327540|+|0-858|ARO:3000986|TEM-124																						99.6205
164	TEM-148	gb|AM087454|+|208-1069|ARO:3001015|TEM-148					99.884
165	TEM-155	gb|DQ679961|+|114-975|ARO:3001021|TEM-155					99.3039
166	TEM-176	gb|GU550123|+|144-1005|ARO:3001041|TEM-176					99.884
167	TEM-186	gb|JN227084|+|308-1169|ARO:3001046|TEM-186					99.884
168	TEM-208	gb|KC865667|+|183-1044|ARO:3001385|TEM-208					99.884
169	TEM-26	gb|L19940|+|197-1006|ARO:3000896|TEM-26											99.0291
170	TEM-29	gb|Y17584|+|0-858|ARO:3000899|TEM-29																					99.6205
171	TEM-30	gb|AJ437107|+|208-1069|ARO:3000900|TEM-30					99.884																					99.884
172	TEM-33	gb|GU371926|-|50304-51165|ARO:3000903|TEM-33					99.884																					99.884
173	TEM-34	gb|KC292503|+|4334-5195|ARO:3000904|TEM-34					99.884																					99.884
174	TEM-4	gb|NG_050265|+|0-1061|ARO:3000876|TEM-4					99.0575								99.0575												99.0575	99.0575
175	TEM-70	gb|AF188199|+|214-1075|ARO:3000936|TEM-70																										99.884
176	TEM-76	gb|AF190694|+|208-1069|ARO:3000942|TEM-76					99.884
177	TEM-80	gb|AF347054|+|208-1069|ARO:3000947|TEM-80					99.3039
178	tet(A)	tet(A)_4_AJ517790				99.9171	100	99.9171			100	100	100								99.9171	100	100	100	100			100
179	tet(B)	tet(B)_4_AF326777				100		100													100	100
180	tet(D)	gb|BX664015|-|204137-204554|ARO:3000168|tet(D)				100		100													99.7608	100
181	tolC	gb|FJ768952|+|0-1488|ARO:3000237|tolC		99.9328	98.7231	99.5968	100	99.5968	98.5215	98.1183	99.7312	99.7312	99.7312	98.1855	98.1855	98.1855	98.1183	98.3199	98.1183	98.1183	99.9328	100	99.7312	99.7312	99.7312	98.3871	98.1855	100
182	TriA	gb|NC_002516.2|+|177306-178458|ARO:3003679|TriA
183	TriB	gb|NC_002516.2|+|178454-179525|ARO:3003680|TriB
184	vgaC	gb|KU302801|+|102199-102430|ARO:3002831|vgaC				85.7798	88.7387	85.7798													85.7798	88.7387						88.7387
185	YojI	gb|NC_000913.3|-|0-1644|ARO:3003952|YojI							98.7226	97.5933				97.2019			98.6618		98.6618
